# Supplementary material
Source: ML conference proceedings conference paper supplement (https://proceedings.neurips.cc/paper_files/paper/2021/hash/38eb982ee635354d3febf457beeee736-Abstract.html)
Supplement: Supplementary file 1 [file 38eb982ee635354d3febf457beeee736-Supplemental.pdf]

## A Proofs

*Proof of Theorem 2.1* For each  $\mu \in \Pi(\hat{\rho}_{\theta, \nu}, \pi)$ , define  $\mu(\theta = \theta_i | \xi) = \nu_{i|\xi}$ . Then we have  $\{\nu_{i|\xi}\}_{i=1}^n \in \mathcal{V}$  for each fixed  $\xi$ , and  $\nu_i = \mathbb{E}_{\xi \sim \pi}[\nu_{i|\xi}]$ ,  $\forall i \in [n]$ . We have

$$\mathbb{E}_{(\theta, \xi) \sim \mu} [f_{\xi}(\theta)] = \mathbb{E}_{\xi \sim \pi} \left[ \sum_{i=1}^n \nu_{i|\xi} f_{\xi}(\theta_i) \right] \geq \mathbb{E}_{\xi \sim \pi} \left[ \min_{i \in [n]} f_{\xi}(\theta_i) \right].$$

Taking inf on  $\mu$  and  $\nu$  yields that

$$\inf_{\nu \in \mathcal{V}} W_f(\hat{\rho}_{\theta, \nu}, \pi) \geq \mathbb{E}_{\xi \sim \pi} \left[ \min_{i \in [n]} f_{\xi}(\theta_i) \right].$$

On the other hand, for  $\nu_i^* = \mathbb{E}_{\xi \sim \pi} \left[ \mathbb{P}(i \in \arg \min_{j \in [n]} f_{\xi}(\theta_j)) \right]$ , we define a coupling  $\mu_{\theta, \pi}^*$  such that 1) its marginal on  $\mathcal{V}$  equals  $\pi$ , and 2)

$$\mu_{\theta, \pi}^*(\theta = \theta_i | \xi) = \mathbb{P}(i \in \arg \min_{j \in [n]} f_{\xi}(\theta_j)) := \nu_{i|\xi}^*.$$

It is easy to show that  $\mu_{\theta, \pi}^*$  matches with  $\nu_i^*$  in that  $\nu_i^* = \mu_{\theta, \pi}^*(\theta = \theta_i)$ , and hence we have  $\mu_{\theta, \pi}^* \in \Pi(\hat{\rho}_{\theta, \nu^*}, \pi)$ . With this, we have

$$\begin{aligned} W_f(\hat{\rho}_{\theta, \nu^*}, \pi) &\leq \mathbb{E}_{(\theta, \xi) \sim \mu_{\theta, \pi}^*} [f_{\xi}(\theta)] \\ &= \mathbb{E}_{\xi \sim \pi} \left[ \sum_{i=1}^n \nu_{i|\xi}^* f_{\xi}(\theta_i) \right] \\ &= \mathbb{E}_{\xi \sim \pi} \left[ \min_{i \in [n]} f_{\xi}(\theta_i) \right]. \end{aligned}$$

This proves that  $\inf_{\nu \in \mathcal{V}} W_f(\hat{\rho}_{\theta, \nu}, \pi) = \mathbb{E}_{\xi \sim \pi} \left[ \min_{i \in [n]} f_{\xi}(\theta_i) \right]$ .  $\square$

*Proof of Theorem 2.3* Note that

$$W_f(\hat{\rho}, \pi) - L^* = \inf_{\mu \in \Pi(\hat{\rho}, \pi)} \mathbb{E}_{(\theta, \xi) \sim \mu} [(f_{\xi}(\theta_i) - f_{\xi}(\theta_{\xi}))].$$

The result then follows immediately from Assumption 2.2 and the definition of  $p$ -Wasserstein distance. Therefore, for any  $\theta$  and  $\nu$ ,

$$W_{p_1}(\hat{\rho}_{\theta^*, \nu^*}, \rho^*) \leq \frac{1}{h_1} (W_f(\hat{\rho}_{\theta^*, \nu^*}, \pi) - L^*) \leq \frac{1}{h_1} (L(\hat{\rho}_{\theta, \nu}, \pi) - L^*) \leq \frac{h_2}{h_1} W_{p_2}(\hat{\rho}_{\theta, \nu}, \rho^*),$$

which yields (5).  $\square$
